# Supplementary material
Source: Springer Nature journal article supplement (https://www.springermedizin.de/resource/supplementary/13049_2013_710_MOESM2_ESM.pdf/9666948)
Supplement: MOESM2 [file 9666948]

## Enrollment

Assessed for eligibility (n=60 )

Excluded (n=0 )

- ◆ Not meeting inclusion criteria (n=0 )
- ◆ Declined to participate (n=0 )
- ◆ Other reasons (n=0 )

Randomized (n=60 )

## Allocation

Standard endotracheal tube on short stylet  
Allocated to intervention (n=30 )

- ◆ Received allocated intervention (n=30 )

EndoFlex endotracheal tube  
Allocated to intervention (n=30 )

- ◆ Received allocated intervention (n=30 )

## Analysis

Analysed (n=30 )

Analysed (n=30 )
